# Supplementary material for: Development of iodine based sustained release antimicrobial coatings for polyurethane voice prostheses
Source: Royal Society of Chemistry journal article supplement (doi:10.1039/d4tb00439f), 2024-01-01
Supplement: d4tb00439f1.pdf [file d4tb00439f1.pdf]

## Supplementary File

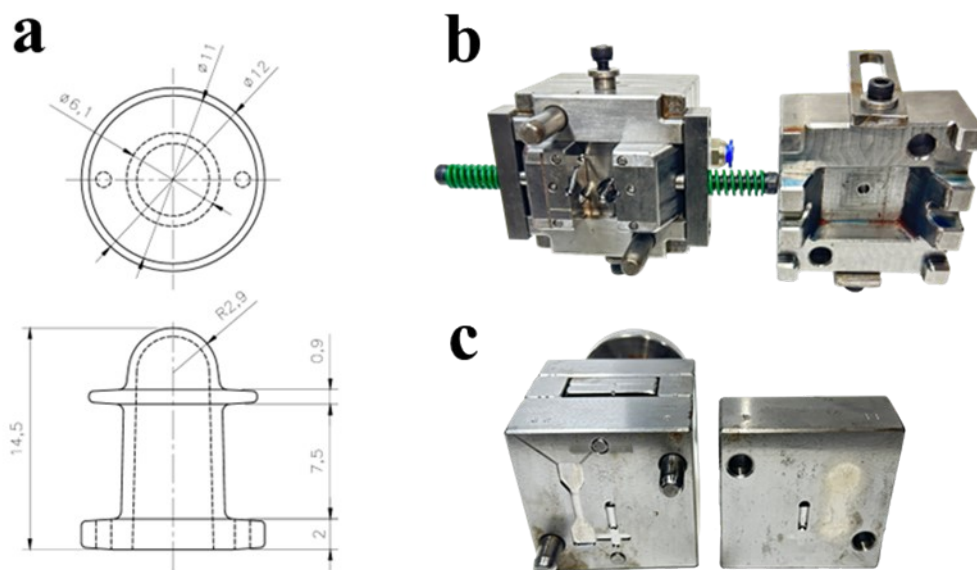

**Fig. S1:** (a) Drawing of the generic indwelling voice prosthesis, (b) Injection molding tool fabricated for voice prosthesis, (c) Injection molding tool for dog bone specimen.

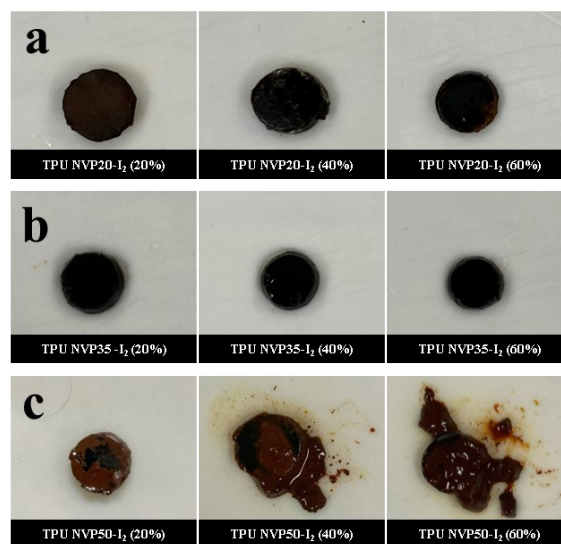

**Fig. S2:** Mechanical stability study of tercopolymer coated iodine loaded discs with 20%, 40% and 60% coat concentrations for (a) TPU NVP20-I<sub>2</sub> with 20% NVP content (b) TPU NVP 35-I<sub>2</sub> with 35% NVP content and (c) TPU NVP50-I<sub>2</sub> with 50% NVP content after 5 days of aqueous incubation.

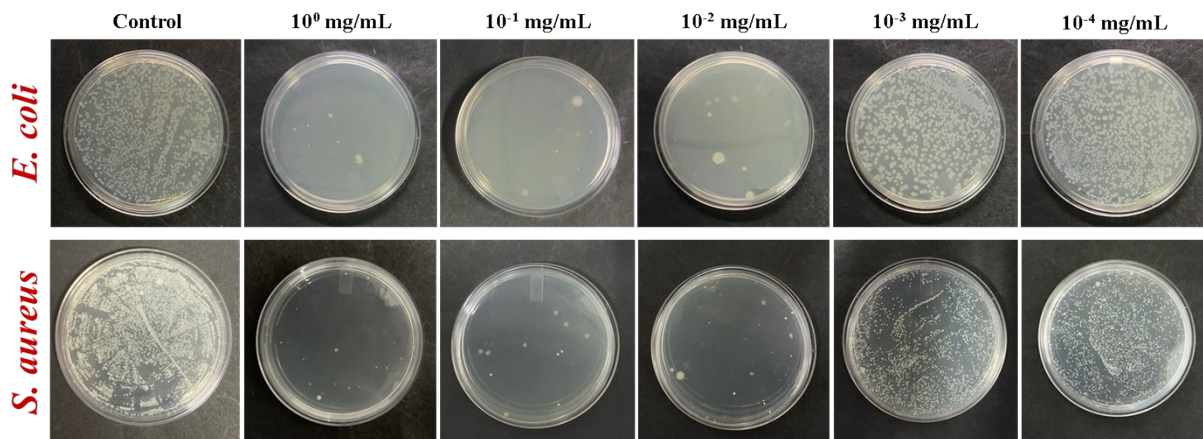

**Fig. S3:** Evaluation of minimum inhibitory concentration of iodine in PBS (pH 7.4) aqueous solution.

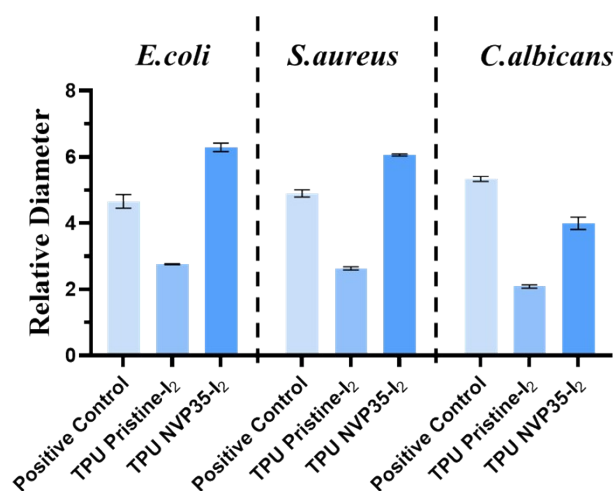

**Fig. S4:** Comparison of relative diameter of zone of inhibition of iodine loaded TPU Pristine, iodine loaded tercopolymer coated TPU for *E. coli*, *S. aureus* and *C. albicans*.

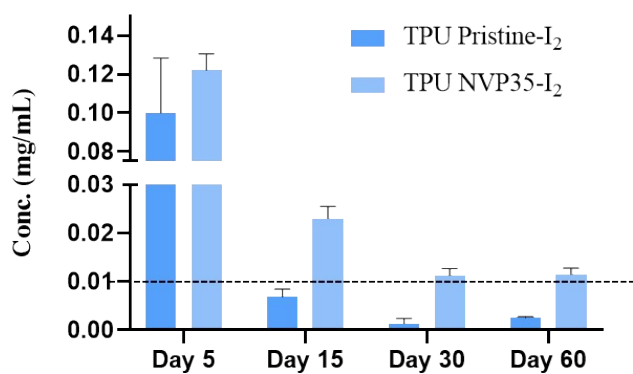

**Fig. S5:** Concentration of iodine released per 24 hours for iodine loaded TPU Pristine and tercopolymer coated iodine loaded TPU discs.
